# Supplementary material for: l-Proline–TBAB-catalyzed phosgene free synthesis of methyl carbamates from amines and dimethyl carbonate
Source: Royal Society of Chemistry journal article supplement (doi:10.1039/c3nj00643c), 2013-01-01

## Supporting Information

### **L-Proline/ TBAB-catalyzed phosgene free synthesis of methyl carbamates from amines and dimethyl carbonate**

**Subodh Kumar and Suman L. Jain**

*Chemical Sciences Division, CSIR-Indian Institute of Petroleum, Mohkampur*

*Dehradun 248005*

#### Characterization of carbamates incorporated L-proline intermediate 5:

Calculated analytical data for  $C_7H_{11}NO_4$ : C (48.55 %), H (6.44 %) and N (8.03 %).

Found values: C (48.05 %), H (6.32 %) and N (7.98 %).

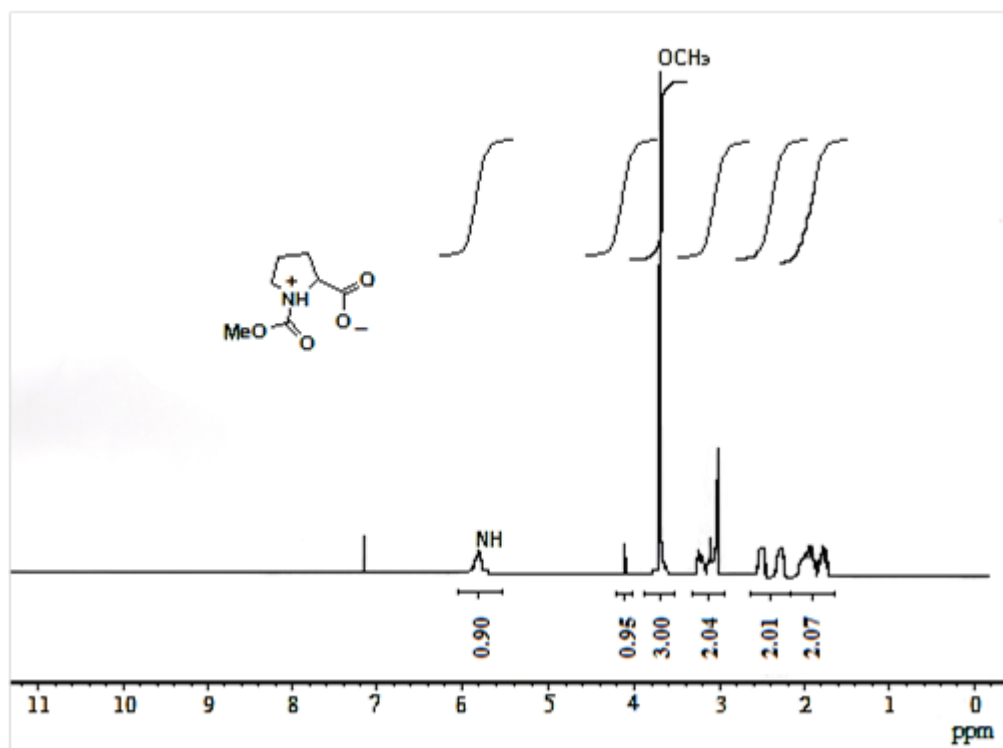

Supplement: c3nj00643c.pdf [file c3nj00643c.pdf]
